# Supplementary material
Source: publisher figshare collection journal article supplement (https://gsajournals.figshare.com/ndownloader/files/26826989)
Supplement: Supplementary file 1 [file 26826989]

## Sheet: spi1a_1 (larvae)
Supplemental Table 4 - NGS reads and read counts for spi1a_1 (larvae)
WT reference sequence:
WT: CTGGTGGGTGGACAGAGAGCGAGGCGTCTTTCAGTTCTCCTCCAAACACAAGGAGACACTCGCCAGCCGCTGGGGCCAGCAAAAGGGCAACCGCAAGAGAATGACCTACCAAAAGATGGCAAGAGCCCTCCGCAACTACGGCAAGACCGG
Sequence	Read Count	Read %
INJECTED #1
CTGGTGGGTGGACAGAGAGCGAGGCGTCTTTCAGTTCTCCTCCAAACACAAGGAGACACTCGCCAGCCGCTGGGGCCAGCAAAAGGGCAACCGCAAGAGAATGACCTACCAAAAGATGGCAAGAGCCCTCCGCAACTACGGCAAGACCGG , WT	2	0
CTGGTGGGTGGACAGAGAGCGAGGCGTCTTTCAGTTCTCCTCCAAACACAAGGAGACACTCGCCAGCAAAAGGGCAACCGCAAGAGAATGACCTACCAAAAGATGGCAAGAGCCCTCCGCAACTACGGCAAGACCGG , 1852	1852	33.3153
CTGGTGGGTGGACAGAGAGCGAGGCGTCTTTCAGTTCTCCTCCAAACACAAGGAGACACTCGCCAGCCGGGGCCAGCAAAAGGGCAACCGCAAGAGAATGACCTACCAAAAGATGGCAAGAGCCCTCCGCAACTACGGCAAGACCGG , 959	959	17.2513
CTGGTGGGTGGACAGAGAGCGAGGCGTCTTTCAGTTCTCCTCCAAACACAAGGAGACACTCGCCAGCCGCAAAAGGGCAACCGCAAGAGAATGACCTACCAAAAGATGGCAAGAGCCCTCCGCAACTACGGCAAGACCGG , 418	418	7.51934
CTGGTGGGTGGACAGAGAGCGAGGCGTCTTTCAGTTCTCCTCCAAACACAAGGAGACACTCGCCAGCCAGCAAAAGGGCAACCGCAAGAGAATGACCTACCAAAAGATGGCAAGAGCCCTCCGCAACTACGGCAAGACCGG , 391	391	7.03364
CTGGTGGGTGGACAGAGAGCGAGGCGTCTTTCAGTTCTCCTCCAAACACAAGGAGACACTGGGGCCAGCAAAAGGGCAACCGCAAGAGAATGACCTACCAAAAGATGGCAAGAGCCCTCCGCAACTACGGCAAGACCGG , 383	383	6.88973
CTGGTGGGTGGACAGAGAGCGAGGCGTCTTTCAGTTCTCCTCCAAACACAAGGAGACACTCGCCAGCCGTGCATGGGGCCAGCAAAAGGGCAACCGCAAGAGAATGACCTACCAAAAGATGGCAAGAGCCCTCCGCAACTACGGCAAGACCGG , 377	377	6.7818
CTGGTGGGTGGACAGAGAGCGAGGCGTCTTTCAGTTCTCCTCCAAACACAAGGAGACACTCGCCAGCTGGGGCCAGCAAAAGGGCAACCGCAAGAGAATGACCTACCAAAAGATGGCAAGAGCCCTCCGCAACTACGGCAAGACCGG , 302	302	5.43263
CTGGTGGGTGGACAGAGAGCGAGGCGTCTTTCAGTTCTCCTCCAAACACAAGGAGACACTCGCCAGCCTGGGGCCAGCAAAAGGGCAACCGCAAGAGAATGACCTACCAAAAGATGGCAAGAGCCCTCCGCAACTACGGCAAGACCGG , 242	242	4.3533
CTGGTGGGTGGACAGAGAGCGAGGCGTCTTTCAGTTCTCCTCCAAACACAAGGAGACACTCGCCAGCAAAAGGGCAACCGCAAGCAAAAGGGCAACCGCCAGCAAAAGGGCAACCGCAAGAGAATGACCTACCAAAAGATGGCAAGAGCCCTCCGCAACTACGGCAAGACCGG , 202	202	3.63375
CTGGTGGGTGGACAGAGAGCGAGGCGTCTTTCAGTTCTCCTCCAAACACAAGGAGACACTCGCCAGCTGAAGAGACACTGGGGCCAGCAAAAGGGCAACCGCAAGAGAATGACCTACCAAAAGATGGCAAGAGCCCTCCGCAACTACGGCAAGACCGG , 162	162	2.91419
CTGGTGGGTGGACAGAGAGCGAGGCGTCTTTCAGTTCTCCTCCAAACACAAGGAGACACTCGCCACTGGGGCCAGCAAAAGGGCAACCGCAAGAGAATGACCTACCAAAAGATGGCAAGAGCCCTCCGCAACTACGGCAAGACCGG , 141	141	2.53643
CTGGTGGGTGGACAGAGAGCGAGGCGTCTTTCAGTTCTCCTCCAAACACAAGGAGACACTCGCCAGCCGAGATATGACCTACCAAAAGATGGCAAGAGCCCTCCGCAACTACGGCAAGACCGG , 130	130	2.33855
INJECTED #2
CTGGTGGGTGGACAGAGAGCGAGGCGTCTTTCAGTTCTCCTCCAAACACAAGGAGACACTCGCCAGCCGCTGGGGCCAGCAAAAGGGCAACCGCAAGAGAATGACCTACCAAAAGATGGCAAGAGCCCTCCGCAACTACGGCAAGACCGG , WT	0	0
CTGGTGGGTGGACAGAGAGCGAGGCGTCTTTCAGTTCTCCTCCAAACACAAGGAGACACTCGCCAGCCAGCAAAAGGGCAACCGCAAGAGAATGACCTACCAAAAGATGGCAAGAGCCCTCCGCAACTACGGCAAGACCGG , 1314	1314	26.5133
CTGGTGGGTGGACAGAGAGCGAGGCGTCTTTCAGTTCTCCTCCAAACACAAGGAGACACTCGCCAGCCGAGCCTGGGGCCAGCAAAAGGGCAACCGCAAGAGAATGACCTACCAAAAGATGGCAAGAGCCCTCCGCAACTACGGCAAGACCGG , 935	935	18.866
CTGGTGGGTGGACAGAGAGCGAGGCGTCTTTCAGTTCTCCTCCAAACACAAGGAGACACTCGCCAGCAAAAGGGCAACCGCAAGAGAATGACCTACCAAAAGATGGCAAGAGCCCTCCGCAACTACGGCAAGACCGG , 890	890	17.958
CTGGTGGGTGGACAGAGAGCGAGGCGTCTTTCAGTTCTCCTCCAAACACAAGGAGACACTCGCCAGCTGGGGCCAGCAAAAGGGCAACCGCAAGAGAATGACCTACCAAAAGATGGCAAGAGCCCTCCGCAACTACGGCAAGACCGG , 809	809	16.3236
CTGGTGGGTGGACAGAGAGCGAGGCGTCTTTCAGTTCTCCTCCAAACACAAGGAGACACTCGCCAGCCGGGGCCAGCAAAAGGGCAACCGCAAGAGAATGACCTACCAAAAGATGGCAAGAGCCCTCCGCAACTACGGCAAGACCGG , 263	263	5.3067
CTGGTGGGTGGACAGAGAGCGAGGCGTCTTTCAGTTCTCCTCCAAACGAGAGGAGAATGCCCTCACACTGGGGCCAGCAAAAGGGCAACCGCAAGAGAATGACCTACCAAAAGATGGCAAGAGCCCTCCGCAACTACGGCAAGACCGG , 224	224	4.51977
CTGGTGGGTGGACAGAGAGCGGGGCCAGCAAAAGGGCAACCGCAAGAGAATGACCTACCAAAAGATGGCAAGAGCCCTCCGCAACTACGGCAAGACCGG , 145	145	2.92575
CTGGTGGGTGGACAGAGAGCGAGGCGTCTTTCAGTTCTCCTCCAAACACAAGGAGACACTCGCCAGCCCTTTTGCTGGCCCTTTTGCTGGCTGGGGGCCAGCAAAAGGGCAACCGCAAGAGAATGACCTACCAAAAGATGGCAAGAGCCCTCCGCAACTACGGCAAGACCGG , 94	94	1.89669
CTGGTGGGTGGACAGAGAGCGAGGCGTCTTTCAGTTCTCCTCCAAACACAAGGAGACACTCGCCAGCCGGCAAAAGGGCAACCGCAAGAGAATGACCTACCAAAAGATGGCAAGAGCCCTCCGCAACTACGGCAAGACCGG , 91	91	1.83616
CTGGTGGGTGGACAGAGAGCGAGGCGTCTTTCAGTTCTCCTCCAAACACAAGGAGACACTCGCCAGCCTGGGGCCAGCAAAAGGGCAACCGCAAGAGAATGACCTACCAAAAGATGGCAAGAGCCCTCCGCAACTACGGCAAGACCGG , 76	76	1.53349
CTGGTGGGTGGACAGAGAGCGAGGCGTCTTTCAGTTCTCCTCCAAACACAAGGAGACACTCGCCAGCAAAAGGGAATGACCTACCAAAAGATGGCAAGAGCCCTCCGCAACTACGGCAAGACCGG , 61	61	1.23083
CTGGTGGGTGGACAGAGAGCGAGGCGTCTTTCAGTTCTCCTCCAAACACAAGGAGACACTCGCCAGCCGCAAGAGAATGACCTACCAAAAGATGGCAAGAGCCCTCCGCAACTACGGCAAGACCGG , 54	54	1.08959
INJECTED #3
CTGGTGGGTGGACAGAGAGCGAGGCGTCTTTCAGTTCTCCTCCAAACACAAGGAGACACTCGCCAGCCGCTGGGGCCAGCAAAAGGGCAACCGCAAGAGAATGACCTACCAAAAGATGGCAAGAGCCCTCCGCAACTACGGCAAGACCGG , WT	1	0
CTGGTGGGTGGACAGAGAGCGAGGCGTCTTTCAGTTCTCCTCCAAACACAAGGAGACACTCGCCAGCCAGCTGGGGCCAGCCAGCTGGGGCCAGCAAAAGGGCAACCGCAAGAGAATGACCTACCAAAAGATGGCAAGAGCCCTCCGCAACTACGGCAAGACCGG , 765	765	19.1441
CTGGTGGGTGGACAGAGAGCGAGGCGTCTTTCAGTTCTCCTCCAAACACAAGGAGACACTCGCCAGCAAAAGGGCAACCGCAAGAGAATGACCTACCAAAAGATGGCAAGAGCCCTCCGCAACTACGGCAAGACCGG , 654	654	16.3664
CTGGTGGGTGGACAGAGAGCGAGGCGTCTTTCAGTTCTCCTCCAAACACAAGGAGACACTCGCCAGCCGAGCAAAAGGCCAGCAAAAGGGCAACCGCAAGAGAATGACCTACCAAAAGATGGCAAGAGCCCTCCGCAACTACGGCAAGACCGG , 558	558	13.964
CTGGTGGGTGGACAGAGAGCGAGGCGTCTTTCAGTTCTCCTCCAAACACAAGGAGACACTCGCCAGCCTGGGGCCAGCAAAAGGGCAACCGCAAGAGAATGACCTACCAAAAGATGGCAAGAGCCCTCCGCAACTACGGCAAGACCGG , 547	547	13.6887
CTGGTGGGTGGACAGAGAGCGAGGCGTCTTTCAGTTCTCCTCCAAACACAAGGAGACACTCGCCAGCAAGGACAAGGAGACACAAGGAGACACTGGGGCCAGCAAAAGGGCAACCGCAAGAGACAACCGCAAGAGAATGACCTACCAAAAGATGGCAAGAGCCCTCCGCAACTACGGCAAGACCGG , 412	412	10.3103
CTGGTGGGTGGACAGAGAGCGAGGCGTCTTTCAGTTCTCCTCCAAACACAAGGAGACACTCGCCAGCAGACACTGGGGCCAGCAAAAGGGCAACCGCAAGAGAATGACCTACCAAAAGATGGCAAGAGCCCTCCGCAACTACGGCAAGACCGG , 271	271	6.78178
CTGGTGGGTGGACAGAGAGCGAGGCGTCTTTCAGTTCTCCTCCAAACACAAGGAGACACTCGCCAGCCGAGTGTTAACCCTAACCCTGGGGCCAGCAAAAGGGCAACCGCAAGAGAATGACCTACCAAAAGATGGCAAGAGCCCTCCGCAACTACGGCAAGACCGG , 159	159	3.97898
CTGGTGGGTGGACAGAGAGCGAGGCGTCTTTCAGTTCTCCTCCAAACACAAGGAGACACTCGCCAGCCAGCAAAAGGGCAACCGCAAGAGAATGACCTACCAAAAGATGGCAAGAGCCCTCCGCAACTACGGCAAGACCGG , 143	143	3.57858
CTGGTGGGTGGACAGAGAGCGAGGCGTCTTTCAGTTCTCCTCCAAACACAAGGAGACACTCGCCAGCCGGGGCCAGCAAAAGGGCAACCGCAAGAGAATGACCTACCAAAAGATGGCAAGAGCCCTCCGCAACTACGGCAAGACCGG , 139	139	3.47848
CTGGTGGGTGGACAGAGAGCGAGGCGTCTTTCAGTTCTCCTCCAAACACAAGGAGACACTCGCCAGCCGAGTGTCCCTAACCCTGGGGCCAGCAAAAGGGCAACCGCAAGAGAATGACCTACCAAAAGATGGCAAGAGCCCTCCGCAACTACGGCAAGACCGG , 127	127	3.17818
CTGGTGGGTGGACAGAGAGCGAGGCGTCTTTCAGTTCTCCTCCAAACACAAGGAGACACTCGCCAGCCTTTTGCTGGGGCCAGCAAAAGGGCAACCGCAAGAGAATGACCTACCAAAAGATGGCAAGAGCCCTCCGCAACTACGGCAAGACCGG , 118	118	2.95295
CTGGTGGGTGGACAGAGAGCGAGGCGTCTTTCAGTTCTCCTCCAAACACAAGGAGACACTCGCCAGCCGTAGTTGGGGCCAGCAAAAGGGCAACCGCAAGAGAATGACCTACCAAAAGATGGCAAGAGCCCTCCGCAACTACGGCAAGACCGG , 103	103	2.57758
INJECTED #4
CTGGTGGGTGGACAGAGAGCGAGGCGTCTTTCAGTTCTCCTCCAAACACAAGGAGACACTCGCCAGCCGCTGGGGCCAGCAAAAGGGCAACCGCAAGAGAATGACCTACCAAAAGATGGCAAGAGCCCTCCGCAACTACGGCAAGACCGG , WT	0	0
CTGGTGGGTGGACAGAGAGCGAGGCGTCTTTCAGTTCTCCTCCAAACACAAGGAGACACTCGCCAGCAAAAGGGCAACCGCAAGAGAATGACCTACCAAAAGATGGCAAGAGCCCTCCGCAACTACGGCAAGACCGG , 1564	1564	29.0006
CTGGTGGGTGGACAGAGAGCGAGGCGTCTTTCAGTTCTCCTCCAAACACAAGGAGACACTCGCCAGCGGTTGCAAAAGGGCAACCGCAAGAGAATGACCTACCAAAAGATGGCAAGAGCCCTCCGCAACTACGGCAAGACCGG , 987	987	18.3015
CTGGTGGGTGGACAGAGAGCGAGGCGTCTTTCAGTTCTCCTCCAAACACAAGGAGACACTCGCCAGCCAGCAAAAGGGCAACCGCAAGAGAATGACCTACCAAAAGATGGCAAGAGCCCTCCGCAACTACGGCAAGACCGG , 598	598	11.0884
CTGGTGGGTGGACAGAGAGCGAGGCGTCTTTCAGTTCTCCTCCAAACACAAGGAGACACTCGCCAGCCGGGGCCAGCAAAAGGGCAACCGCAAGAGAATGACCTACCAAAAGATGGCAAGAGCCCTCCGCAACTACGGCAAGACCGG , 397	397	7.36139
CTGGTGGGTGGACAGAGAGCGAGGCGTCTTTCAGTTCTCCTCCAAACACAAGGAGACACTCCCCAGACACTGGGGCCAGCAAAAGGGCAACCGCAAGAGAATGACCTACCAAAAGATGGCAAGAGCCCTCCGCAACTACGGCAAGACCGG , 266	266	4.93232
CTGGTGGGTGGACAGAGAGCGAGGCGTCTTTCAGTTCTCCTCCAAACACAAGGAGACACTCGCCAGACACTGGGGCCAGCAAAAGGGCAACCGCAAGAGAATGACCTACCAAAAGATGGCAAGAGCCCTCCGCAACTACGGCAAGACCGG , 264	264	4.89523
CTGGTGGGTGGACAGAGAGCGAGGCGTCTTTCAGTTCTCCTCCAAACACAAGGAGACACTCGCCAGCAAAAAAACTGGGGCCAGCAAAAGGGCAACCGCAAGAGAATGACCTACCAAAAGATGGCAAGAGCCCTCCGCAACTACGGCAAGACCGG , 261	261	4.83961
CTGGTGGGTGGACAGAGAGCGAGGCGTCTTTCAGTTCTCCTCCAAACACAAGGAGACACTGGGGCCAGCAAAAGGGCAACCGCAAGAGAATGACCTACCAAAAGATGGCAAGAGCCCTCCGCAACTACGGCAAGACCGG , 240	240	4.45021
CTGGTGGGTGGACAGAGAGCGAGGCGTCTTTCAGTTCTCCTCCAAACACAAGGAGACACTCGCCAGCCGGCAAAAGGCCAGCAAAAGTTTGCCCCCTCACATAGGGCCAGCAAAAGGGCAACCGCAAGAGAATGACCTACCAAAAGATGGCAAGAGCCCTCCGCAACTACGGCAAGACCGG , 221	221	4.0979
CTGGTGGGTGGACTGGGGCCAGCAAAAGGGCAACCGCAAGAGAATGACCTACCAAAAGATGGCAAGAGCCCTCCGCAACTACGGCAAGACCGG , 213	213	3.94956
CTGGTGGGTGGACAGAGAGCGAGGCGTCTTTCAGTTCTCCTCCAAACACAAGGAGACACTCGCCAGCCACTCTGGGGCCAGCAAAAGGGCAACCGCAAGAGAATGACCTACCAAAAGATGGCAAGAGCCCTCCGCAACTACGGCAAGACCGG , 205	205	3.80122
CTGGTGGGTGGACAGAGAGCGAGGCGTCTTTCAGTTCTCCTCCAAACACAAGGAGACACTCGCCAGCTGGGGCCAGCAAAAGGGCAACCGCAAGAGAATGACCTACCAAAAGATGGCAAGAGCCCTCCGCAACTACGGCAAGACCGG , 177	177	3.28203
INJECTED #5
CTGGTGGGTGGACAGAGAGCGAGGCGTCTTTCAGTTCTCCTCCAAACACAAGGAGACACTCGCCAGCCGCTGGGGCCAGCAAAAGGGCAACCGCAAGAGAATGACCTACCAAAAGATGGCAAGAGCCCTCCGCAACTACGGCAAGACCGG , WT	2	0
CTGGTGGGTGGACAGAGAGCGAGGCGTCTTTCAGTTCTCCTCCAAACACAAGGAGACACTCGCCAGCCGAGCCGGCTGACACTCGCCAGCCGGGGCCAGCAAAAGGGCAACCGCAAGAGAATGACCTACCAAAAGATGGCAAGAGCCCTCCGCAACTACGGCAAGACCGG , 797	797	19.387
CTGGTGGGTGGACAGAGAGCGAGGCGTCTTTCAGTTCTCCTCCAAACACAAGGAGACACTCGCCAGC-ACTGGGGCCAGCAAAAGGGCAACCGCAAGAGAATGACCTACCAAAAGATGGCAAGAGCCCTCCGCAACTACGGCAAGACCGG , 792	792	19.2654
CTGGTGGGTGGACAGAGAGCGAGGCGTCTTTCAGTTCTCCTCCAAACACAAGGAGACACTCGCCAGCCGGCGAGACAAGGAGACTGGGGCCAGCAAAAGGGCAACCGCAAGAGAATGACCTACCAAAAGATGGCAAGAGCCCTCCGCAACTACGGCAAGACCGG , 616	616	14.9842
CTGGTGGGTGGACAGAGAGCGAGGCGTCTTTCAGTTCTCCTCCAAACACAAGGGCAACCGCAAGAGAATGACCTACCAAAAGATGGCAAGAGCCCTCCGCAACTACGGCAAGACCGG , 587	587	14.2788
CTGGTGGGTGGACAGAGAGCGAGGCGTCTTTCAGTTCTCCTCCAAACACAAGGAGACACTCGCCAGCAAAAGGGCAACCGCAAGAGAATGACCTACCAAAAGATGGCAAGAGCCCTCCGCAACTACGGCAAGACCGG , 344	344	8.36779
CTGGTGGGTGGACAGAGAGCGAGGCGTCTTTCAGTTCTCCTCCAAACACAAGGAGACACTCGCCAGCCGAGTGGGGCCAGCAAAAGGGCAACCGCAAGAGAATGACCTACCAAAAGATGGCAAGAGCCCTCCGCAACTACGGCAAGACCGG , 255	255	6.20287
CTGGTGGGTGGACAGAGAGCGAGGCGTCTTTCAGTTCTCCTCCAAACACAAGGAGACACTCGCCAGCCGAGGGCCAGCAAAAGGGCAACCGCAAGAGAATGACCTACCAAAAGATGGCAAGAGCCCTCCGCAACTACGGCAAGACCGG , 206	206	5.01095
CTGGTGGGTGGACAGAGAGCGAGGCGTCTTTCAGTTCTCCTCCAAACACAAGGAGACACTCGCCAGCCGGGGCCAGCAAAAGGGCAACCGCAAGAGAATGACCTACCAAAAGATGGCAAGAGCCCTCCGCAACTACGGCAAGACCGG , 172	172	4.1839
CTGGTGGGTGGACAGAGAGCGAGGCGTCTTTCAGTTCTCCTCCAAACACAAGGAGACACTCGCCAGCCAGCAAAAGGGCAACCGCAAGAGAATGACCTACCAAAAGATGGCAAGAGCCCTCCGCAACTACGGCAAGACCGG , 146	146	3.55145
CTGGTGGGTGGACAGAGAGCGAGGCGTCTTTCAGTTCTCCTCCAAACACAAGGAGACACTCGCCAGCCGTGCTGGGGCCAGCAAAAGGGCAACCGCAAGAGAATGACCTACCAAAAGATGGCAAGAGCCCTCCGCAACTACGGCAAGACCGG , 101	101	2.45682
CTGGTGGGTGGACAGAGAGCGAGGCGTCTTTCAGTTCTCCTCCAAACACAAGGAGACACTCGCCAGCTGGGGCCAGCAAAAGGGCAACCGCAAGAGAATGACCTACCAAAAGATGGCAAGAGCCCTCCGCAACTACGGCAAGACCGG , 49	49	1.19192
CTGGTGGGTGGACAGAGAGCGAGGCGTCTTTCAGTTCTCCTCCAAACACAAGGAGACACTGGGGCCAGCAAAAGGGCAACCGCAAGAGAATGACCTACCAAAAGATGGCAAGAGCCCTCCGCAACTACGGCAAGACCGG , 46	46	1.11895
INJECTED #6
CTGGTGGGTGGACAGAGAGCGAGGCGTCTTTCAGTTCTCCTCCAAACACAAGGAGACACTCGCCAGCCGCTGGGGCCAGCAAAAGGGCAACCGCAAGAGAATGACCTACCAAAAGATGGCAAGAGCCCTCCGCAACTACGGCAAGACCGG , WT	8	0
CTGGTGGGTGGACAGAGAGCGAGGCGTCTTTCAGTTCTCCTCCAAACACAAGGAGACACTCGCCAGGGGCCAGCTGGGGCCAGCAAAAGGGCAACCGCAAGAGAATGACCTACCAAAAGATGGCAAGAGCCCTCCGCAACTACGGCAAGACCGG , 745	745	20.2776
CTGGTGGGTGGACAGAGAGCGAGGCGTCTTTCAGTTCTCCTCCAAACACAGACACTGGGGCCAGCAAAAGGGCAACCGCAAGAGAATGACCTACCAAAAGATGGCAAGAGCCCTCCGCAACTACGGCAAGACCGG , 645	645	17.5558
CTGGTGGGTGGACAGAGAGCGAGGCGTCTTTCAGTTCTCCTCCAAACACAAGGAGACACTCGCCAGCAAAAGGGCAACCGCAAGAGAATGACCTACCAAAAGATGGCAAGAGCCCTCCGCAACTACGGCAAGACCGG , 606	606	16.4943
CTGGTGGGTGGACAGAGAGCGAGGCGTCTTTCAGTTCTCCTCCAAACACAAGGAGACACTCGCCAGCCGGGGCCAGCAAAAGGGCAACCGCAAGAGAATGACCTACCAAAAGATGGCAAGAGCCCTCCGCAACTACGGCAAGACCGG , 590	590	16.0588
CTGGTGGGTGGACAGAGAGCGAGGCGTCTTTCAGTTCTCCTCCAAACACAAGGAGACACTCGCCAGCTGGGGCCAGCAAAAGGGCAACCGCAAGAGAATGACCTACCAAAAGATGGCAAGAGCCCTCCGCAACTACGGCAAGACCGG , 221	221	6.01524
CTGGTGGGTGGACAGAGAGCGAGGCGTCTTTCAGTTCTCCTCCAAACACAAGGAGACACTCGCCAGCCGAGTGTCATATCACCCACCATTGCTGGGGCCAGCAAAAGGGCAACCGCAAGAGAATGACCTACCAAAAGATGGCAAGAGCCCTCCGCAACTACGGCAAGACCGG , 178	178	4.84486
CTGGTGGGTGGACAGAGAGCGAGGCGTCTTTCAGTTCTCCTCCAAACACAAGGAGACACTCGACACTCACAAGGGGCCAGCAAAAGGGCAACCGCAAGAGAATGACCTACCAAAAGATGGCAAGAGCCCTCCGCAACTACGGCAAGACCGG , 160	160	4.35493
CTGGTGGGTGGACAGAGAGCGAGGCGTCTTTCAGTTCTCCTCCAAACACAAGGAGACACTCGCCAGCCAGCAAAAGGGCAACCGCAAGAGAATGACCTACCAAAAGATGGCAAGAGCCCTCCGCAACTACGGCAAGACCGG , 143	143	3.89222
CTGGTGGGTGGACAGAGAGCGAGGCGTCTTTCAGTTCTCCTCCAAACACAAGGAGACACTCGAGACACTGGGGCCAGCAAAAGGGCAACCGCAAGAGAATGACCTACCAAAAGATGGCAAGAGCCCTCCGCAACTACGGCAAGACCGG , 101	101	2.74905
CTGGTGGGTGGACAGAGAGCGAGGCGTCTTTCAGTTCTCCTCCAAACACAAGGAGACACTCGCCAGCCACTGCAGCTGGGGCCAGCAAAAGGGCAACCGCAAGAGAATGACCTACCAAAAGATGGCAAGAGCCCTCCGCAACTACGGCAAGACCGG , 100	100	2.72183
CTGGTGGGTGGACAGAGAGCGAGGCGTCTTTCAGTTCTCCTCCAAACACAAGGAGACACTCGCCAGCCACTGGGGCCAGCAAAAGGGCAACCGCAAGAGAATGACCTACCAAAAGATGGCAAGAGCCCTCCGCAACTACGGCAAGACCGG , 94	94	2.55852
CTGGTGGGTGGACAGAGAGCGAGGCGTCTTTCAGTTCTCCTCCAAACACAAGGAGACACTCGCCAGCCGGCGAAAAGGGCCAGCAAAAGGGCAACCGCAAGAGAATGACCTACCAAAAGATGGCAAGAGCCCTCCGCAACTACGGCAAGACCGG , 91	91	2.47686
INJECTED #7
CTGGTGGGTGGACAGAGAGCGAGGCGTCTTTCAGTTCTCCTCCAAACACAAGGAGACACTCGCCAGCCGCTGGGGCCAGCAAAAGGGCAACCGCAAGAGAATGACCTACCAAAAGATGGCAAGAGCCCTCCGCAACTACGGCAAGACCGG , WT	0	0
CTGGTGGGTGGACAGAGAGCGAGGCGTCTTTCAGTTCTCCTCCAAACACAAGGAGACACTCGCCAGCAAAAGGGCAACCGCAAGAGAATGACCTACCAAAAGATGGCAAGAGCCCTCCGCAACTACGGCAAGACCGG , 2290	2290	33.6864
CTGGTGGGTGGACAGAGAGCGAGGCGTCTTTCAGTTCTCCTCCAAACACAAGGAGACACTCGCCAGCCGGGGCCAGCAAAAGGGCAACCGCAAGAGAATGACCTACCAAAAGATGGCAAGAGCCCTCCGCAACTACGGCAAGACCGG , 2106	2106	30.9797
CTGGTGGGTGGACAGAGAGCGAGGCGTCTTTCAGTTCTCCTCCAAACACAAGGAGACACTCGCCAGCCTGGGGCCAGCAAAAGGGCAACCGCAAGAGAATGACCTACCAAAAGATGGCAAGAGCCCTCCGCAACTACGGCAAGACCGG , 1140	1140	16.7696
CTGGTGGGTGGACAGAGAGCGAGGCGTCTTTCAGTTCTCCTCCAAACACAAGGAGACACTCGCCAGCCGCCACCCACCAGATGGGGCCAGCAAAAGGGCAACCGCAAGAGAATGACCTACCAAAAGATGGCAAGAGCCCTCCGCAACTACGGCAAGACCGG , 542	542	7.97293
CTGGTGGGTGGACAGAGAGCGAGGCGTCTTTCAGTTCTCCTCCAAACACAAGGAGACACTCGCCAGCCGGGGGCCAGCAAAAGGGCAACCGCAAGAGAATGACCTACCAAAAGATGGCAAGAGCCCTCCGCAACTACGGCAAGACCGG , 241	241	3.54516
CTGGTGGGTGGACAGAGAGCGAGGCGTCTTTCAGTTCTCCTCCAAACACAAGGAGACACTCGCCAGCTGGGGCCAGCAAAAGGGCAACCGCAAGAGAATGACCTACCAAAAGATGGCAAGAGCCCTCCGCAACTACGGCAAGACCGG , 168	168	2.47132
CTGGTGGGTGGACAGAGAGCGAGGCGTCTTTCAGTTCTCCTCCAAACACAAGGAGACACTCGCCAGCCTTCAGGGGCCAGCAAAAGGGCAACCGCAAGAGAATGACCTACCAAAAGATGGCAAGAGCCCTCCGCAACTACGGCAAGACCGG , 167	167	2.4566
CTGGTGGGTGGACAGAGAGCGAGGCGTCTTTCAGTTCTCCTCCAAACACAAGGAGACACTCGCCAGCCGGGGCTGGGGCCAGCAAAAGGGCAACCGCAAGAGAATGACCTACCAAAAGATGGCAAGAGCCCTCCGCAACTACGGCAAGACCGG , 60	60	0.882613
CTGGTGGGTGGACAGAGAGCGAGGCGTCTTTCAGTTCTCCTCCAAACACAAGGAGACACTCGCCAGCCAGCAAAAGGGCAACCGCAAGAGAATGACCTACCAAAAGATGGCAAGAGCCCTCCGCAACTACGGCAAGACCGG , 29	29	0.426596
CTGGTGGGTGGACAGAGAGCGAGGCGTCTTTCAGTTCTCCTCCAAACACAAGGAGACACTCGCCAGCCGAGTGGCCAGCAAAAGGGCAACCGCAAGAGAATGACCTACCAAAAGATGGCAAGAGCCCTCCGCAACTACGGCAAGACCGG , 21	21	0.308914
CTGGTGGGTGGACAGAGAGCGAGGCGTCTTTCAGGGGGCCTACGGCAACTACGGCAAGACCGG , 17	17	0.250074
CTGGTGGGTGGACAGAGAGCGAGGCGTCTTTCAGTTCTCCTCCAAACACAAGGAGACACTCGCCAGCCGAGTGGGGCCAGCAAAAGGGCAACCGCAAGAGAATGACCTACCAAAAGATGGCAAGAGCCCTCCGCAACTACGGCAAGACCGG , 17	17	0.250074
INJECTED #8
CTGGTGGGTGGACAGAGAGCGAGGCGTCTTTCAGTTCTCCTCCAAACACAAGGAGACACTCGCCAGCCGCTGGGGCCAGCAAAAGGGCAACCGCAAGAGAATGACCTACCAAAAGATGGCAAGAGCCCTCCGCAACTACGGCAAGACCGG , WT	0	0
CTGGTGGGTGGACAGAGAGCGAGGCGTCTTTCAGTTCTCCTCCAAACACAAGGAGACACTCGCCAGCAAAAGGGCAACCGCAAGAGAATGACCTACCAAAAGATGGCAAGAGCCCTCCGCAACTACGGCAAGACCGG , 920	920	28.3426
CTGGTGGGTGGACAGAGAGCGAGGCGTCTTTCAGTTCTCCTCCAAACACAAGGAGACACTCGACACTCGCCTGGGGCCAGCAAAAGGGCAACCGCAAGAGAATGACCTACCAAAAGATGGCAAGAGCCCTCCGCAACTACGGCAAGACCGG , 523	523	16.1121
CTGGTGGGTGGACAGAGAGCGAGGCGTCTTTCAGTTCTCCTCCAAACACAAGGAGACACTCGCCAGCCGGCGAGGGCAACCGCAAGAGAATGACCTACCAAAAGATGGCAAGAGCCCTCCGCAACTACGGCAAGACCGG , 392	392	12.0764
CTGGTGGGTGGACAGAGAGCGAGGCGTCTTTCAGTTCTCCTCCAAACACAAGGAGACACTCGCCAGCCAGCAAAAGGGCCAGCAAAAGGGCAACCGCAAGAGAATGACCTACCAAAAGATGGCAAGAGCCCTCCGCAACTACGGCAAGACCGG , 273	273	8.41035
CTGGTGGGTGGACAGAGAGCGAGGCGTCTTTCAGTTCTCCTCCAAACACAAGGAGACACTCGCCAGCCAGCAAAAGGGCAACCGCAAGAGAATGACCTACCAAAAGATGGCAAGAGCCCTCCGCAACTACGGCAAGACCGG , 244	244	7.51694
CTGGTGGGTGGACAGAGAGCGAGGCGTCTTTCAGTTCTCCTCCAAACACAAGGAGACACTCGCCAGCCAGCAAAAAGGCAACCGCAAGAGAATGACCTACCAAAAGATGGCAAGAGCCCTCCGCAACTACGGCAAGACCGG , 179	179	5.51448
CTGGTGGGTGGACAGAGAGCGAGGCGTCTTTCAGTTCTCCTCCAAACACAAGGAGACACTCGCCAGCCGGGGCCAGCAAAAGGGCAACCGCAAGAGAATGACCTACCAAAAGATGGCAAGAGCCCTCCGCAACTACGGCAAGACCGG , 161	161	4.95995
CTGGTGGGTGGACAGAGAGCGAGGCGTCTTTCAGTTCTCCTCCAAACACAAGGAGACACTCGCCAGCTGGGGCCAGCAAAAGGGCAACCGCAAGAGAATGACCTACCAAAAGATGGCAAGAGCCCTCCGCAACTACGGCAAGACCGG , 133	133	4.09735
CTGGTGGGTGGACAGAGAGCGAGGCGTCTTTCAGTTCTCCTCCAAACACAAGGAGACACTGGGGCCAGCAAAAGGGCAACCGCAAGAGAATGACCTACCAAAAGATGGCAAGAGCCCTCCGCAACTACGGCAAGACCGG , 110	110	3.38879
CTGGTGGGTGGACAGAGAGCGAGGCGTCTTTCAGTTCTCCTCCAAACACAAGGAGACACTCGCCAGCCGGGGGCCAGCAAAAGGGCAACCGCAAGAGAATGACCTACCAAAAGATGGCAAGAGCCCTCCGCAACTACGGCAAGACCGG , 110	110	3.38879
CTGGTGGGTGGACAGAGAGCGAGGCGTCTTTCAGTTCTCCTCCAAACACAAGGAGACACTCGCTGGGGCCAGCAAAAGGGCAACCGCAAGAGAATGACCTACCAAAAGATGGCAAGAGCCCTCCGCAACTACGGCAAGACCGG , 109	109	3.35798
CTGGTGGGTGGACAGAGAGCGAGGCGTCTTTCAGTTCTCCTCCAAACACAAGGAGACACTCGCCAGCCGGGGCAACCAGCAAAAGGGCAACCGCAAGAGAATGACCTACCAAAAGATGGCAAGAGCCCTCCGCAACTACGGCAAGACCGG , 92	92	2.83426
